# Supplementary figures and images for: Comprehensive Analysis of the Prognostic Significance of the TRIM Family in the Context of TP53 Mutations in Cancers
Source: MDPI journal article supplement (doi:10.3390/cancers15153792), 2023-07-26

Figure 6A

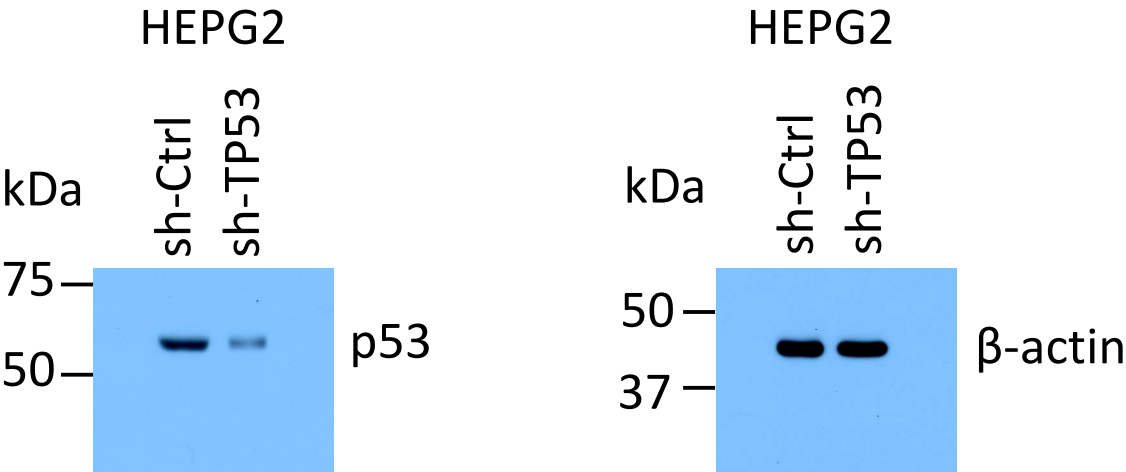

Supplement: s1 [file s1]
